# Supplementary material for: RARRES3 suppresses breast cancer lung metastasis by regulating adhesion and differentiation
Source: PubMed Central journal article supplement (PMC4119352; doi:10.15252/emmm.201303675), 2014-05-27
Supplement: emmm0006-0865-SD2.pdf [file emmm0006-0865-SD2.pdf]

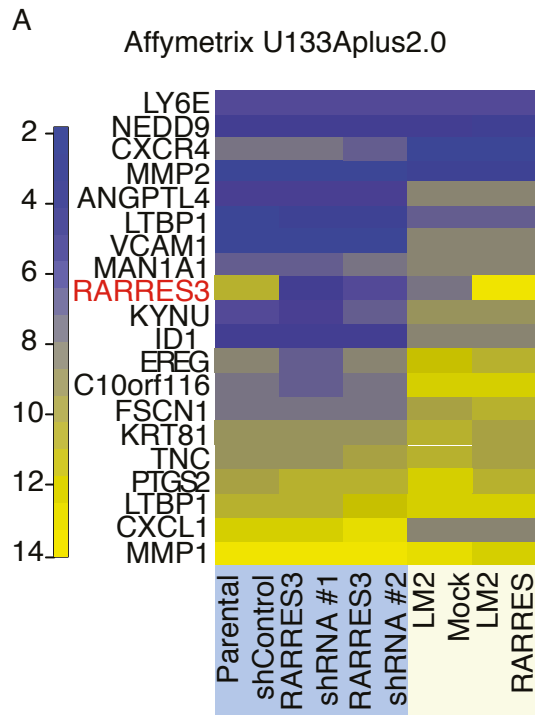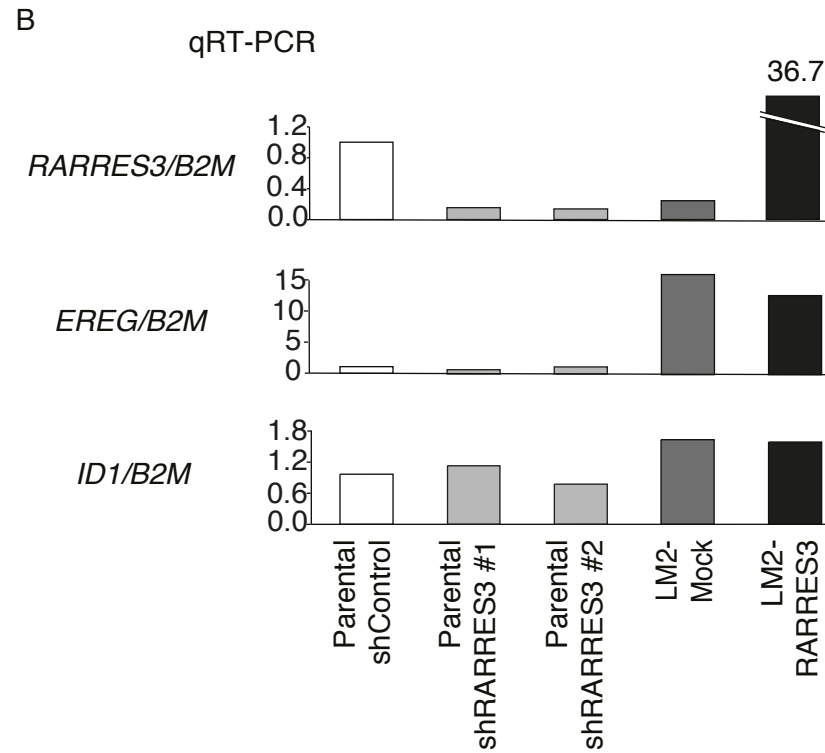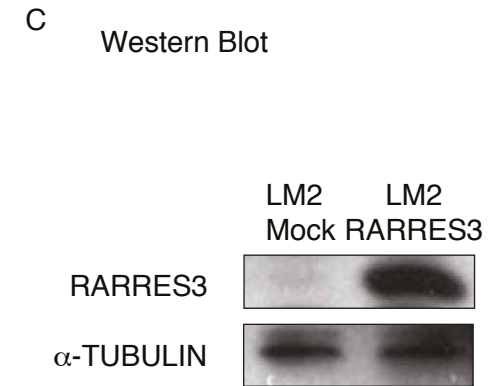

## Supplementary Figure S2

- (A) Knockdown of RARRES3 in Parental MDA-MB-231 cells and RARRES3 overexpression in LM2 metastatic derivatives as confirmed by gene expression profiling (Affymetrix U133APlus2.0). None of the other previously defined Lung Metastasis Signature Genes is consistently affected under the previous conditions.
- (B) *RARRES3*, *EREG* and *IDI* mRNA expression levels measured by qRT-PCR and normalized to *B2M* levels. Data are presented as mean of three independent experiments.
- (C) Western Blot analysis of RARRES3 levels in the indicated cell populations.  $\alpha$ -TUBULIN was used as a loading control.
