# Supplementary material for: RARRES3 suppresses breast cancer lung metastasis by regulating adhesion and differentiation
Source: PubMed Central journal article supplement (PMC4119352; doi:10.15252/emmm.201303675), 2014-05-27
Supplement: emmm0006-0865-SD4.pdf [file emmm0006-0865-SD4.pdf]

A

|                             | Parental       |                |                | LM2            |                |
|-----------------------------|----------------|----------------|----------------|----------------|----------------|
|                             | shControl      | sh RARRES3#1   | shRARRES3 #2   | Mock           | RARRES3        |
| <b>IHC</b>                  |                |                |                |                |                |
| Ki-67 (% positive)          |                |                |                |                |                |
| 1ary Tumor                  | 33.3<br>(±7.0) | 39.3<br>(±8.5) | 34.0<br>(±1.5) | 24.5<br>(±0.6) | 27.7<br>(±2.3) |
| Lung Mets<br>(7 weeks PI)   | 24.7<br>(±3.1) | 28.5<br>(±5.3) | 24.1<br>(±5.5) | 28.4<br>(±1.7) | 25.2<br>(±1.6) |
| <b>in vivo</b>              |                |                |                |                |                |
| Caspase 3 (positive/field)  |                |                |                |                |                |
| 1ary Tumor                  | 19.6<br>(±2.3) | 25.6<br>(±2.3) | 20.6<br>(±2.5) | N/A            | N/A            |
| Caspase 3 (Arbitrary units) |                |                |                |                |                |
| Lung Mets<br>(7 weeks PI)   | 17.4<br>(±5.4) | 21.6<br>(±2.2) | 27.1<br>(±4.7) | 8.9<br>(±2.0)  | 9.3<br>(±1.9)  |

B

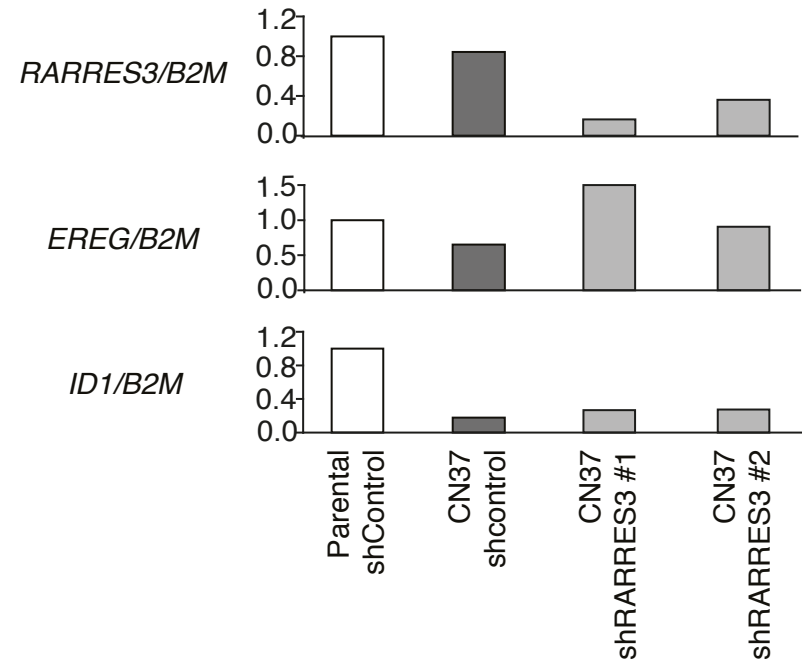

C

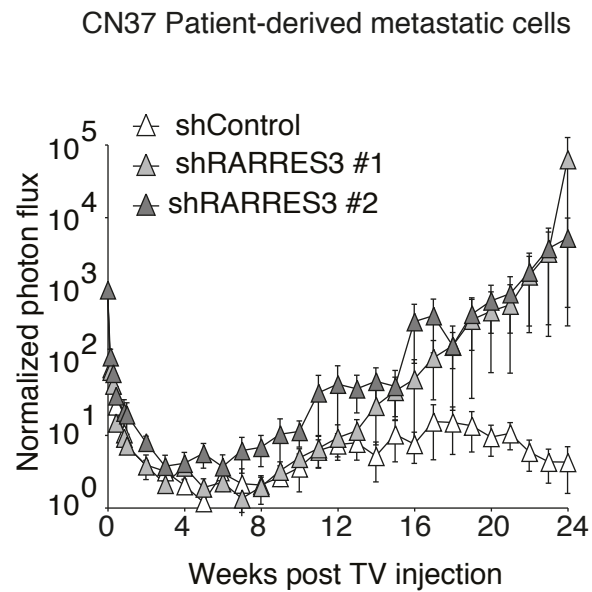

D

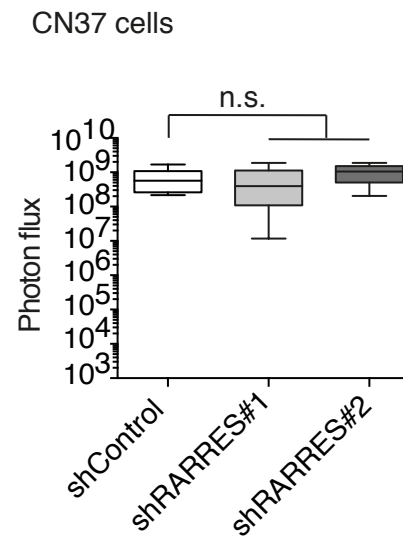

E

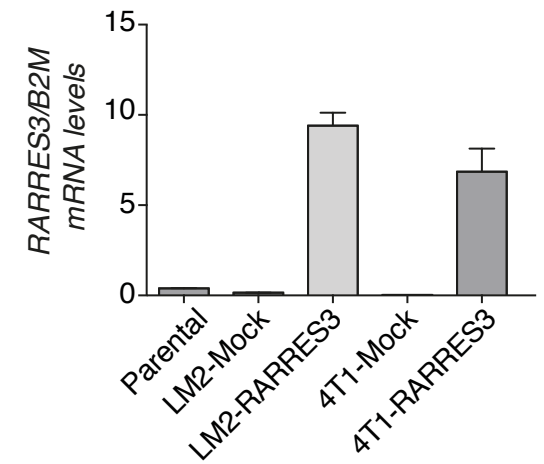

Supporting Information Figure 4

## Supplementary Figure S4

- (A) Percentage of Ki-67 positive cells in MFP tumors and lung metastasis 7 weeks post-inoculation were scored. Similarly, cleaved caspase-3 activity (arbitrary units) was determined by IHC in MFP tumors and lung metastasis 7 weeks post-inoculation. Five fields per section and 5 sections per lung/tumor were scored. Data are averages  $\pm$  SD.
- (B) *RARRES3*, *EREG* and *ID1* mRNA expression measured by qRT-PCR and normalized to *B2M* levels.
- (C) CN37 cells ( $2 \times 10^5$ ) expressing a control vector (parental) or two independent *RARRES3* shRNA vectors (sh*RARRES3* #1 and #2) were injected into the tail vein of mice. Lung colonization was assayed by weekly bioluminescence imaging. Plots show normalized photon flux in the lung over time (n=9, 9 or 8 per group, respectively).
- (D) CN37 cells ( $5 \times 10^5$ ) expressing a shControl vector or two independent sh*RARRES3* vectors were implanted contra-laterally into the fourth mammary fat pad of mice, and tumor growth was measured at week 10 (end point) by photon flux determination. Data are averages  $\pm$  SD (n=8 tumors per condition).
- (E) *RARRES3* mRNA expression measured by qRT-PCR and normalized to *B2M* levels in Parental MDA-231, 4T1-Mock and 4T1-*RARRES3* cells. Data are presented as mean of three independent experiments  $\pm$  SD.
