# Supplementary material for: RARRES3 suppresses breast cancer lung metastasis by regulating adhesion and differentiation
Source: PubMed Central journal article supplement (PMC4119352; doi:10.15252/emmm.201303675), 2014-05-27
Supplement: emmm0006-0865-SD5.pdf [file emmm0006-0865-SD5.pdf]

A

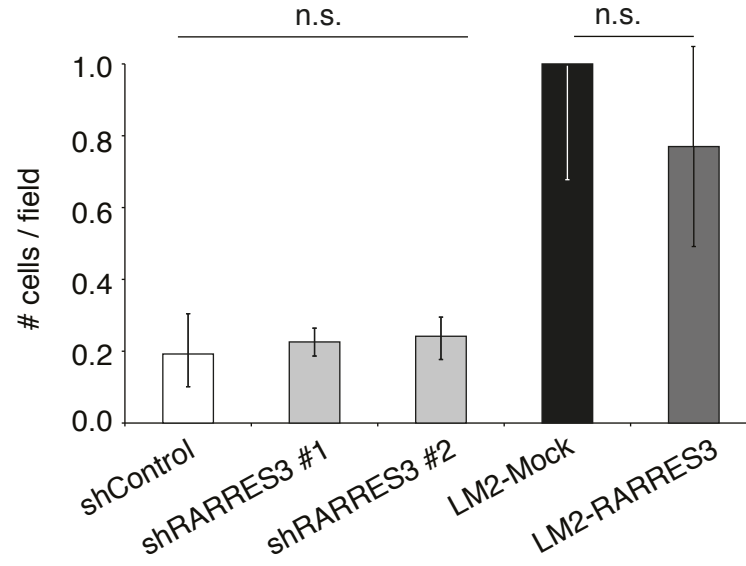

B

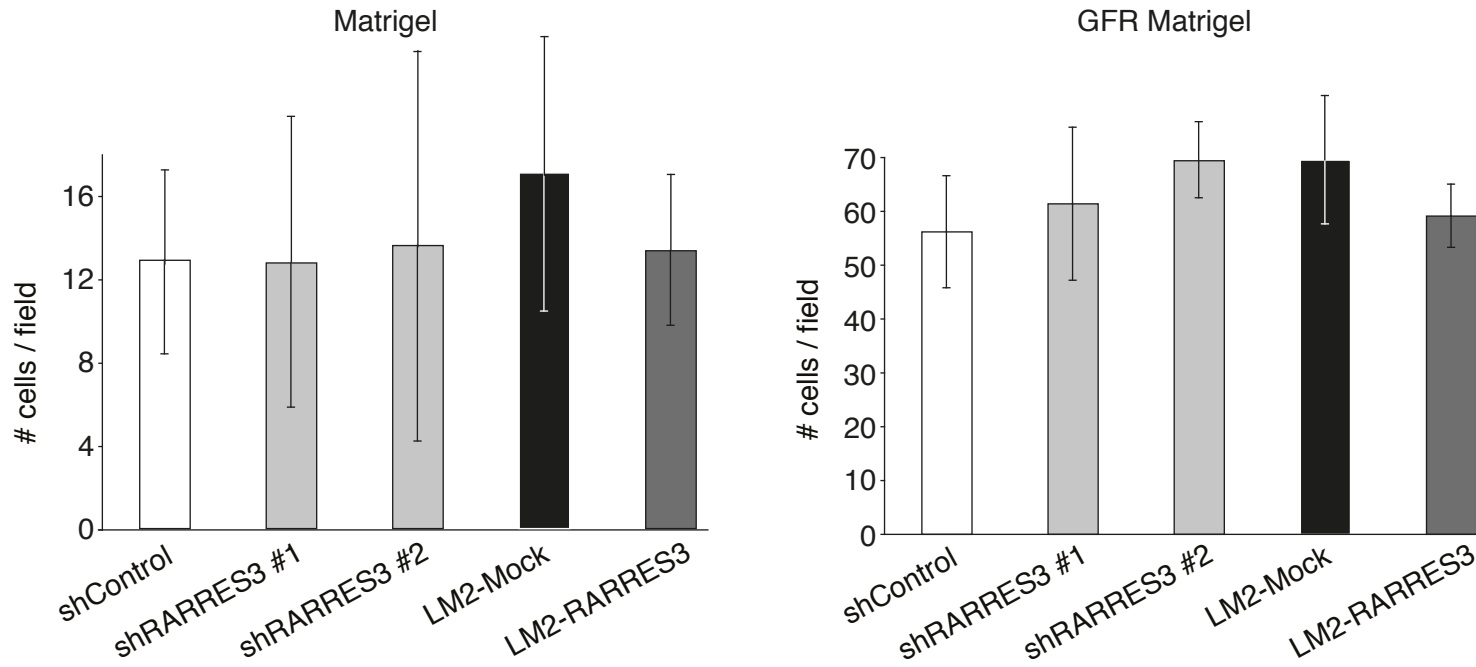

## Supplementary Figure S5

- (A) Migration of parental and LM2 cells expressing different levels of RARRES3 were scored in Boyden chambers covered with fibronectin. Each cell line was seeded in triplicate and 5 fields per chamber were counted. Results represent the average of three independent experiments  $\pm$  SD
- (B) Invasion of parental and LM2 cells expressing different levels of RARRES3 were scored in Boyden chambers covered with Matrigel (left panel) or growth factor-reduced Matrigel (right panel). Each cell line was seeded in triplicate, and 5 fields per chamber were counted. Results represent the average of three independent experiments  $\pm$  SD
