# Supplementary material for: RARRES3 suppresses breast cancer lung metastasis by regulating adhesion and differentiation
Source: PubMed Central journal article supplement (PMC4119352; doi:10.15252/emmm.201303675), 2014-05-27
Supplement: emmm0006-0865-SD6.pdf [file emmm0006-0865-SD6.pdf]

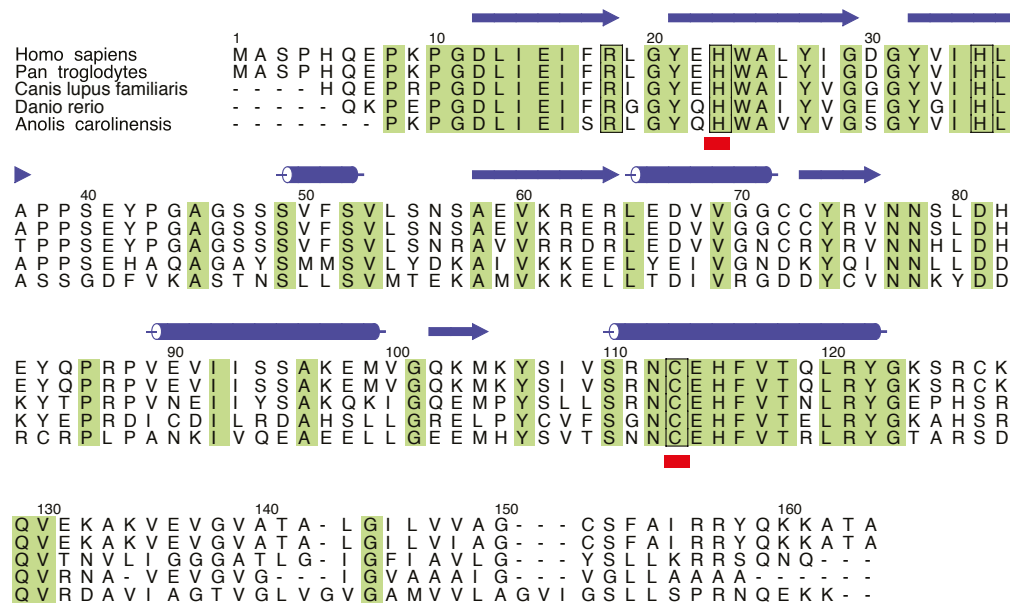

Mutant  
 RARRES-DEAD  
 Cys113Ser  
 His23Phe

Supporting Information Figure 6

## **Supplementary Figure S6**

Sequence alignment of various RARRES3 homologous sequences showing conserved residues (green) and proposed active site residues (black boxes). The secondary structures of H-REV107 are shown above the alignment (purple).
