# Supplementary material for: RARRES3 suppresses breast cancer lung metastasis by regulating adhesion and differentiation
Source: PubMed Central journal article supplement (PMC4119352; doi:10.15252/emmm.201303675), 2014-05-27
Supplement: emmm0006-0865-SD8.pdf [file emmm0006-0865-SD8.pdf]

**Supplementary Table S 1.** Clinical validation of potential metastasis suppressors described in the literature (Horack et al. 2008). In bold, those whose expression in the primary tumor predicts risk of site-specific relapse.

| Gene symbol | Hazard Ratio of overall Mets | Hazard Ratio of Lung* Mets | Hazard Ratio of Brain* Mets | Hazard Ratio of Bone Mets |
|-------------|------------------------------|----------------------------|-----------------------------|---------------------------|
| PEBP1       | -1,10                        | <b>-1,44**</b>             | <b>-1,43</b>                | -1,01                     |
| RARRES3     | -1,03                        | <b>-1,31</b>               | -1,01                       | 1,02                      |
| SMAD7       | -1,08                        | -1,20                      | -1,37                       | -1,05                     |
| ARHGDIB     | -1,02                        | -1,16                      | 1,21                        | 1,04                      |
| BRMS1       | -1,06                        | -1,15                      | -1,12                       | -1,03                     |
| CASP8       | 1,02                         | -1,15                      | 1,02                        | 1,01                      |
| CDH1        | -1,06                        | -1,12                      | 1,07                        | -1,03                     |
| MAP2K7      | -1,06                        | -1,12                      | -1,24                       | -1,04                     |
| AKAP12      | 1,01                         | -1,09                      | 1,11                        | 1,04                      |
| CLDN4       | -1,03                        | -1,09                      | 1,07                        | 1,04                      |
| SOCS3       | -1,03                        | -1,06                      | -1,16                       | 1,05                      |
| GPR68       | 1,01                         | -1,03                      | -1,19                       | 1,06                      |
| MAP2K6      | 1,01                         | -1,02                      | -1,21                       | 1,04                      |
| MAP2K4      | -1,03                        | -1,01                      | 1,18                        | -1,04                     |
| MATN2       | -1,01                        | 1,01                       | 1,29                        | -1,11                     |
| MED23       | 1,04                         | 1,02                       | -1,11                       | 1,08                      |
| GSN         | -1,03                        | 1,06                       | 1,16                        | -1,00                     |
| RECK        | 1,05                         | 1,07                       | -1,06                       | 1,01                      |
| CTGF        | 1,04                         | 1,11                       | 1,03                        | 1,05                      |
| CD44        | 1,01                         | 1,11                       | 1,13                        | -1,01                     |
| DCC         | 1,06                         | 1,13                       | 1,25                        | 1,07                      |
| NME1        | -1,00                        | 1,16                       | 1,24*                       | -1,13                     |
| KISS1       | 1,08                         | 1,18                       | <b>1,67</b>                 | 1,06                      |
| DLC1        | 1,07                         | 1,21*                      | -1,04                       | 1,11                      |
| DRG1        | 1,04                         | <b>1,33*</b>               | 1,01                        | -1,10                     |
| CD82        | 1,04                         | <b>1,39</b>                | 1,26                        | -1,03                     |

\*p<0.01  
\*\*p=0.019
